# Supplementary material for: Methotrexate and relative risk of dementia amongst patients with rheumatoid arthritis: a multi-national multi-database case-control study
Source: Springer Nature journal article supplement (doi:10.1186/s13195-020-00606-5), 2020-04-06
Supplement: MOESM1 [file 13195_2020_606_MOESM1_ESM.xlsx]

## Sheet: RAW
			unadjusted models
		IPCI		HSD		AUH		UPF		SIDIAP		THIN		Meta					total number used in study
	RA	0.88	(0.79-0.979)*	2.541	(1.257-5.137)*	1.936	(1.643-2.282)*	1.648	(1.16-2.34)*	0.893	(0.832-0.957)*	1.005	(0.926-1.09)	1.282	(0.921-1.785)				5502572
	PSO	0.866	(0.768-0.976)*	0.879	(0.582-1.328)	2.718	(2.137-3.459)*	1.123	(0.786-1.603)	0.888	(0.832-0.947)*	1.027	(0.964-1.095)	1.131	(0.794-1.612)
	MTX	1.011	(0.833-1.228)	1.428	(0.491-4.153)	1.253	(1.057-1.486)*	-	-	0.665	(0.212-2.083)	-
	SUL	0.694	(0.519-0.927)*	0.45	(0.093-2.182)	0.705	(0.546-0.909)*	-	-	0.756	(0.646-0.885)*	-
	Total	n	118414	14504	233083	42921	2108350	234014	2751286
	Table 2 adjusted	02:00:00	Summary	Results	UC12	adjusted	models	(Age,	BMI,
	Stroke,	AMI)	case-control	analysis
		IPCI		HSD		AUH		UPF		SIDIAP		THIN		Meta
	RA	0.899	(0.807-1.001)	2.359	(1.149-4.844)*	1.452	(1.209-1.745)*	1.499	(1.036-2.169)*	0.882	(0.823-0.946)*	0.966	(0.888-1.051)	1.143	(0.899-1.454)
	PSO	0.87	(0.771-0.983)*	0.897	(0.59-1.365)	2.685	(2.075-3.475)*	1.079	(0.752-1.546)	0.902	(0.846-0.962)*	1.047	(0.98-1.118)	1.132	(0.803-1.596)
	MTX	1.016	(0.836-1.236)	1.365	(0.466-4.002)	1.024	(0.845-1.241)	-		-		0.708	(0.21-2.39)	-
	SUL	0.694	(0.519-0.929)*	0.444	(0.091-2.155)	0.574	(0.439-0.75)*	-		-		0.749	(0.637-0.881)*	-
	Total	n	118414		14504		233083		42921		2108350		234014		2751286
		IPCI		HSD		AUH		UPF		SIDIAP		THIN		Meta
	RA	0.896	(0.805-0.998)*	2.34	(1.154-4.746)*	1.919	(1.607-2.293)*	1.636	(1.143-2.342)*	0.879	(0.819-0.943)*	0.972	(0.894-1.057)	1.256	(0.911-1.733)
	PSO	0.877	(0.777-0.989)*	0.889	(0.588-1.344)	2.601	(2.009-3.366)*	1.058	(0.739-1.516)	0.898	(0.842-0.957)*	1.044	(0.978-1.114)	1.121	(0.803-1.565)
	MTX	1.014	(0.834-1.232)	1.301	(0.448-3.782)	1.247	(1.031-1.509)*	-	-	0.752	(0.228-2.485)	-
	SUL	0.697	(0.521-0.932)*	0.442	(0.091-2.147)	0.653	(0.5-0.853)*	-	-	0.747	(0.636-0.878)*	-
	Total	n	118414	14504	233083	42921	2108350	234014	2751286
	Table	08:00:00	Summary	Results	UC12	of	drug	effects	in	disease	populations
	unadjusted	and	adjusted	models
			MTX		SUL
	RA	unadjusted	0.759	(0.56-1.029)	0.878	(0.568-1.356)
	RA	adjusted	0.716	(0.524-0.979)	0.89	(0.573-1.381)
	RA	adjustedNS	0.714	(0.523-0.975)	0.881	(0.568-1.365)
	PSO	unadjusted	1.1	(0.708-1.708)	0.535	(0.133-2.152)
	PSO	adjusted	1.016	(0.646-1.598)	0.587	(0.144-2.392)
	PSO	adjustedNS	1.023	(0.652-1.604)	0.586	(0.144-2.387)
	complete case analysis
	unadjusted
		IPCI		HSD		AUH		UPF		SIDIAP		THIN		Meta
	RA	0.882	(0.743-1.048)	7.831	(0.812-75.546)	4.477	(3.246-6.175)*	0.428	(0.122-1.496)	0.89	(0.83-0.953)*	1.055	(0.953-1.168)	1.332	(0.655-2.708)
	PSO	0.912	(0.764-1.089)	0.947	(0.449-1.996)	4.06	(2.51-6.567)*	1.161	(0.449-3)	0.867	(0.82-0.917)*	1.012	(0.938-1.092)	1.219	(0.753-1.972)
	Total	31233		863		27651		1030		1343989		117205		-
	adjusted
		IPCI		HSD		AUH		UPF		SIDIAP		THIN		Meta
	RA	0.906	(0.761-1.078)	7.513	(0.74-76.304)	2.887	(2.066-4.035)*	0.397	(0.105-1.504)	0.869	(0.811-0.931)*	1.004	(0.903-1.116)	1.18	(0.693-2.009)
	PSO	0.911	(0.762-1.09)	1.072	(0.506-2.27)	4.001	(2.46-6.506)*	1.041	(0.381-2.847)	0.884	(0.837-0.934)*	1.026	(0.948-1.111)	1.228	(0.766-1.97)
	Total	n	31233	863	27651	1030	1343989	117205	-
	adjusted NS
		IPCI		HSD		AUH		UPF		SIDIAP		THIN		Meta
	RA	0.899	(0.757-1.069)	7.504	(0.737-76.42)	4.539	(3.279-6.284)*	0.541	(0.153-1.912)	0.867	(0.808-0.929)*	1.006	(0.906-1.117)	1.349	(0.678-2.684)
	PSO	0.93	(0.778-1.111)	1.013	(0.478-2.147)	3.705	(2.287-6.003)*	1.232	(0.469-3.237)	0.884	(0.837-0.934)*	1.022	(0.945-1.106)	1.225	(0.785-1.912)
	Total	31233		863		27651		1030		1343989		117205		-

## Sheet: SUMMARY
Methotrexate is associated with a reduced risk of dementia amongst patients with Rheumatoid Arthritis: a multi-national multi-database case-control study
Supporting infromation tables
Table S1	Characteristics of databases utilised
Table S2	Clinical diagnosis codes used for disease variables
Table S3	Age specific breakdown of dementia occurance in 5 year intervals with duration of treatment usage
Table S4	Association between of days of use of methotrexate treatment and dementia diagnosis in people with rheumatoid arthritis using conditional logistic regression analysis
Figure S1	Forest plot showing the association between methotrexate and sulfasalazine treatment with dementia diagnosis in people with rheumatoid arthritis using conditional logistic regression analysis

## Sheet: TABLE S1
Table S1 Characteristics of databases utilised
Database Name	Type of data source	Country (Catchment area)	Data collection since	Source population size (million)	Source population size (active)	Diagnoses	Average follow up time (years)	Database reference
						(setting, coding system)
IPCI	Primary care	Netherlands	1995	2.8 M	1.8 M	Primary care	3	1
		(Rotterdam)				ICPC
AUH	Record linkage system	Denmark	2000	2.3 M	1.8 M	Inpatient, secondary ICD10	13	2
		(Jutland)
THIN	Primary care	United Kingdom	2002	12 M	3.8 M	Primary care,	9	3,4
		(all)				Read Codes
SIDIAP	Primary care	Spain	2006	6 M	5.5 M	Inpatient, secondary ICD10	7.4	5,6
		(Catalonia)
References
1) Vlug AE, van der Lei J, Mosseveld BM, van Wijk MA, van der Linden PD, Sturkenboom MC, et al. Postmarketing surveillance based on electronic patient records: the IPCI project. Methods Inf Med. 1999 Dec;38(4–5):339–44.
2) Grann AF, Erichsen R, Nielsen AG, Frøslev T, Thomsen RW. Existing data sources for clinical epidemiology: The clinical laboratory information system (LABKA) research database at Aarhus University, Denmark. Clin Epidemiol. 2011 Apr 1;3:133–8.
3) Bourke A, Dattani H, Robinson M. Feasibility study and methodology to create a quality-evaluated database of primary care data. Inform Prim Care. 2004;12(3):171–7.
4) Lewis JD, Schinnar R, Bilker WB, Wang X, Strom BL. Validation studies of the health improvement network (THIN) database for pharmacoepidemiology research. Pharmacoepidemiol Drug Saf. 2007 Apr;16(4):393–401.
5) García-Gil MDM, Hermosilla E, Prieto-Alhambra D, Fina F, Rosell M, Ramos R, et al. Construction and validation of a scoring system for the selection of high-quality data in a Spanish population primary care database (SIDIAP). Inform Prim Care. 2011;19(3):135–45.
6) Bolíbar B, Fina Avilés F, Morros R, del Mar Garcia-Gil M, Hermosilla E, Ramos R, et al. Base de datos SIDIAP: la historia clínica informatizada de Atención Primaria como fuente de información para la investigación epidemiológica. Med Clin (Barc). 2012 May 19;138(14):617–21.
IPCI
Contains GPs record of all relevant medical information from primary and secondary care, information on demographics, notes on symptoms and diagnoses (using the International Classification of Primary Care (ICPC) dictionary for IPCI and ICD9 for HSD), clinical findings, referrals, laboratory values, hospitalizations, and drug prescriptions. Clinical notes/narratives and referral letters from spec…
AUH
Initiated in Denmark in 1989, but implemented in most counties in 2000. Of the, 1.8 million people are currently active this represents 31% of the current Danish population. Collects data on reimbursed and dispensed medications at all community pharmacies of the North Denmark Region and the Central Denmark Region. The Danish primary health care sector includes GPs, specialists, and dentists, and …
THIN
Comprising patient data that is systematically and prospectively recorded by GPs across UK. Includes administrative and clinical data using the READ codes or entered as free-text, and all prescriptions issued. Clinical encoding of diagnosis, symptoms, laboratory tests and results, surgical procedures and therapeutics are available as well as information such as hospital letters entered as free-te…
SIDIAP
Created by the Catalan Institute of Health and the IDIAP Jordi Gol to generate reliable research data from the Primary Care computerised medical records within the Catalan Institute of Health and other complementary databases. Demographic, visits to primary care, health problems, clinical variables, immunization, death, prescriptions and laboratory. Linkage to hospital records mortaility and dise…

## Sheet: TABLE S2
Table S2 Clinical diagnosis codes used for disease variables
EventType	Code	Database	Coding
AMI	G30..00	THIN	READ
AMI	G30..11	THIN	READ
AMI	G30..12	THIN	READ
AMI	G30..13	THIN	READ
AMI	G30..14	THIN	READ
AMI	G30..15	THIN	READ
AMI	G30..16	THIN	READ
AMI	G300.00	THIN	READ
AMI	G301.00	THIN	READ
AMI	G301000	THIN	READ
AMI	G301100	THIN	READ
AMI	G301Z00	THIN	READ
AMI	G302.00	THIN	READ
AMI	G303.00	THIN	READ
AMI	G304.00	THIN	READ
AMI	G305.00	THIN	READ
AMI	G306.00	THIN	READ
AMI	G307.00	THIN	READ
AMI	G307000	THIN	READ
AMI	G307100	THIN	READ
AMI	G308.00	THIN	READ
AMI	G309.00	THIN	READ
AMI	G30B.00	THIN	READ
AMI	G30X.00	THIN	READ
AMI	G30X000	THIN	READ
AMI	G30Y.00	THIN	READ
AMI	G30Y000	THIN	READ
AMI	G30Y100	THIN	READ
AMI	G30Y200	THIN	READ
AMI	G30YZ00	THIN	READ
AMI	G30Z.00	THIN	READ
AMI	G31..00	THIN	READ
AMI	G310.00	THIN	READ
AMI	G310.11	THIN	READ
AMI	G311500	THIN	READ
AMI	G312.00	THIN	READ
AMI	G31Y.00	THIN	READ
AMI	G31Y000	THIN	READ
AMI	G31Y100	THIN	READ
AMI	G31Y200	THIN	READ
AMI	G31Y300	THIN	READ
AMI	G31YZ00	THIN	READ
AMI	G35..00	THIN	READ
AMI	G350.00	THIN	READ
AMI	G351.00	THIN	READ
AMI	G36..00	THIN	READ
AMI	G360.00	THIN	READ
AMI	G361.00	THIN	READ
AMI	G362.00	THIN	READ
AMI	G365.00	THIN	READ
AMI	G366.00	THIN	READ
AMI	G38..00	THIN	READ
AMI	G381.00	THIN	READ
AMI	G384.00	THIN	READ
AMI	G38Z.00	THIN	READ
AMI	G353.00	THIN	READ
AMI	G35X.00	THIN	READ
AMI	G380.00	THIN	READ
AMI	G382.00	THIN	READ
AMI	G383.00	THIN	READ
AMI	GYU3400	THIN	READ
AMI	GYU3500	THIN	READ
AMI	GYU3600	THIN	READ
DEM	66H..00	THIN	READ
DEM	6AB..00	THIN	READ
DEM	8BM0200	THIN	READ
DEM	8CET.00	THIN	READ
DEM	8CME000	THIN	READ
DEM	8CMG200	THIN	READ
DEM	8CMZ.00	THIN	READ
DEM	8CMZ000	THIN	READ
DEM	8CMZ100	THIN	READ
DEM	8CMZ200	THIN	READ
DEM	8CMZ300	THIN	READ
DEM	8CSA.00	THIN	READ
DEM	8HLA.00	THIN	READ
DEM	8IAE000	THIN	READ
DEM	8IAE200	THIN	READ
DEM	8T05.00	THIN	READ
DEM	8T05000	THIN	READ
DEM	9HD..00	THIN	READ
DEM	9HD0.00	THIN	READ
DEM	9HD1.00	THIN	READ
DEM	9OU..00	THIN	READ
DEM	9OU1.00	THIN	READ
DEM	9OU2.00	THIN	READ
DEM	9OU3.00	THIN	READ
DEM	9OU4.00	THIN	READ
DEM	9OU5.00	THIN	READ
DEM	E00..11	THIN	READ
DEM	E00..12	THIN	READ
DEM	E000.00	THIN	READ
DEM	E001.00	THIN	READ
DEM	E001000	THIN	READ
DEM	E001100	THIN	READ
DEM	E001200	THIN	READ
DEM	E001300	THIN	READ
DEM	E001Z00	THIN	READ
DEM	E002.00	THIN	READ
DEM	E002000	THIN	READ
DEM	E002100	THIN	READ
DEM	E002Z00	THIN	READ
DEM	E003.00	THIN	READ
DEM	E004.00	THIN	READ
DEM	E004.11	THIN	READ
DEM	E004000	THIN	READ
DEM	E004100	THIN	READ
DEM	E004200	THIN	READ
DEM	E004300	THIN	READ
DEM	E004Z00	THIN	READ
DEM	EU00.00	THIN	READ
DEM	EU00000	THIN	READ
DEM	EU00011	THIN	READ
DEM	EU00012	THIN	READ
DEM	EU00013	THIN	READ
DEM	EU00100	THIN	READ
DEM	EU00111	THIN	READ
DEM	EU00112	THIN	READ
DEM	EU00113	THIN	READ
DEM	EU00200	THIN	READ
DEM	EU00Z00	THIN	READ
DEM	EU00Z11	THIN	READ
DEM	EU01.00	THIN	READ
DEM	EU01.11	THIN	READ
DEM	EU01000	THIN	READ
DEM	EU01100	THIN	READ
DEM	EU01111	THIN	READ
DEM	EU01200	THIN	READ
DEM	EU01300	THIN	READ
DEM	EU01Y00	THIN	READ
DEM	EU01Z00	THIN	READ
DEM	EU02.00	THIN	READ
DEM	EU02000	THIN	READ
DEM	EU02100	THIN	READ
DEM	EU02200	THIN	READ
DEM	EU02300	THIN	READ
DEM	EU02400	THIN	READ
DEM	EU02500	THIN	READ
DEM	EU02Y00	THIN	READ
DEM	EU02Z00	THIN	READ
DEM	EU02Z11	THIN	READ
DEM	EU02Z13	THIN	READ
DEM	EU02Z14	THIN	READ
DEM	8BPA.00	THIN	READ
RA	38DZ.00	THIN	READ
RA	38DZ000	THIN	READ
RA	66H..13	THIN	READ
RA	66HB000	THIN	READ
RA	7P20300	THIN	READ
RA	9HR..00	THIN	READ
RA	9HR0.00	THIN	READ
RA	9HR1.00	THIN	READ
RA	9MM..00	THIN	READ
RA	9MM0.00	THIN	READ
RA	9MM1.00	THIN	READ
RA	9MM2.00	THIN	READ
RA	9MM3.00	THIN	READ
RA	9MM4.00	THIN	READ
RA	F371200	THIN	READ
RA	F396400	THIN	READ
RA	N04..00	THIN	READ
RA	N040.00	THIN	READ
RA	N040000	THIN	READ
RA	N040100	THIN	READ
RA	N040200	THIN	READ
RA	N040300	THIN	READ
RA	N040400	THIN	READ
RA	N040500	THIN	READ
RA	N040600	THIN	READ
RA	N040700	THIN	READ
RA	N040800	THIN	READ
RA	N040900	THIN	READ
RA	N040A00	THIN	READ
RA	N040B00	THIN	READ
RA	N040C00	THIN	READ
RA	N040D00	THIN	READ
RA	N040E00	THIN	READ
RA	N040F00	THIN	READ
RA	N040G00	THIN	READ
RA	N040H00	THIN	READ
RA	N040J00	THIN	READ
RA	N040K00	THIN	READ
RA	N040L00	THIN	READ
RA	N040M00	THIN	READ
RA	N040N00	THIN	READ
RA	N040P00	THIN	READ
RA	N040Q00	THIN	READ
RA	N040R00	THIN	READ
RA	N040S00	THIN	READ
RA	N040T00	THIN	READ
RA	N041.00	THIN	READ
RA	N042.00	THIN	READ
RA	N042000	THIN	READ
RA	N042100	THIN	READ
RA	N042200	THIN	READ
RA	N042Z00	THIN	READ
RA	N043.00	THIN	READ
RA	N043000	THIN	READ
RA	N043100	THIN	READ
RA	N043200	THIN	READ
RA	N043300	THIN	READ
RA	N043Z00	THIN	READ
RA	N044.00	THIN	READ
RA	N044.11	THIN	READ
RA	N045500	THIN	READ
RA	N047.00	THIN	READ
RA	N04X.00	THIN	READ
RA	N04Y000	THIN	READ
RA	N04Y011	THIN	READ
RA	N04Y012	THIN	READ
RA	N093.00	THIN	READ
RA	N093000	THIN	READ
RA	N093100	THIN	READ
RA	N093400	THIN	READ
RA	N093700	THIN	READ
RA	N093800	THIN	READ
RA	N093900	THIN	READ
RA	N093Z00	THIN	READ
RA	N135100	THIN	READ
RA	N240300	THIN	READ
RA	N240700	THIN	READ
RA	N240Z00	THIN	READ
RA	N2Y..00	THIN	READ
RA	N2Z..00	THIN	READ
RA	NYU1100	THIN	READ
RA	NYU1200	THIN	READ
RA	NYU1G00	THIN	READ
RA	N044.12	THIN	READ
RA	N093500	THIN	READ
RA	N093600	THIN	READ
STROKE	G63Y000	THIN	READ
STROKE	G63Y100	THIN	READ
STROKE	G64..00	THIN	READ
STROKE	G64..11	THIN	READ
STROKE	G64..12	THIN	READ
STROKE	G64..13	THIN	READ
STROKE	G640.00	THIN	READ
STROKE	G640000	THIN	READ
STROKE	G64Z.00	THIN	READ
STROKE	G64Z.11	THIN	READ
STROKE	G64Z.12	THIN	READ
STROKE	G64Z000	THIN	READ
STROKE	G64Z100	THIN	READ
STROKE	G64Z200	THIN	READ
STROKE	G64Z300	THIN	READ
STROKE	G64Z400	THIN	READ
STROKE	G66..00	THIN	READ
STROKE	G66..11	THIN	READ
STROKE	G66..12	THIN	READ
STROKE	G66..13	THIN	READ
STROKE	G667.00	THIN	READ
STROKE	G668.00	THIN	READ
STROKE	G671000	THIN	READ
STROKE	G677000	THIN	READ
STROKE	G677100	THIN	READ
STROKE	G677200	THIN	READ
STROKE	G677300	THIN	READ
STROKE	G6W..00	THIN	READ
STROKE	G6X..00	THIN	READ
STROKE	GYU6300	THIN	READ
STROKE	GYU6400	THIN	READ
STROKE	GYU6600	THIN	READ
STROKE	GYU6G00	THIN	READ
AMI	I21	SIDIAP	ICD-10
AMI	I21.0	SIDIAP	ICD-10
AMI	I21.1	SIDIAP	ICD-10
AMI	I21.2	SIDIAP	ICD-10
AMI	I21.3	SIDIAP	ICD-10
AMI	I21.4	SIDIAP	ICD-10
AMI	I21.9	SIDIAP	ICD-10
AMI	I23	SIDIAP	ICD-10
AMI	I23.0	SIDIAP	ICD-10
AMI	I23.1	SIDIAP	ICD-10
AMI	I23.3	SIDIAP	ICD-10
AMI	I23.4	SIDIAP	ICD-10
AMI	I23.5	SIDIAP	ICD-10
AMI	I23.6	SIDIAP	ICD-10
AMI	I24.1	SIDIAP	ICD-10
AMI	I24.9	SIDIAP	ICD-10
DEM	A81.0	SIDIAP	ICD-10
DEM	F00	SIDIAP	ICD-10
DEM	F00.0	SIDIAP	ICD-10
DEM	F00.1	SIDIAP	ICD-10
DEM	F00.2	SIDIAP	ICD-10
DEM	F00.9	SIDIAP	ICD-10
DEM	F01	SIDIAP	ICD-10
DEM	F01.0	SIDIAP	ICD-10
DEM	F01.1	SIDIAP	ICD-10
DEM	F01.2	SIDIAP	ICD-10
DEM	F01.8	SIDIAP	ICD-10
DEM	F01.9	SIDIAP	ICD-10
DEM	F02	SIDIAP	ICD-10
DEM	F02.0	SIDIAP	ICD-10
DEM	F02.1	SIDIAP	ICD-10
DEM	F02.2	SIDIAP	ICD-10
DEM	F02.3	SIDIAP	ICD-10
DEM	F02.4	SIDIAP	ICD-10
DEM	F02.8	SIDIAP	ICD-10
DEM	F03	SIDIAP	ICD-10
DEM	F05.1	SIDIAP	ICD-10
DEM	G30	SIDIAP	ICD-10
DEM	G30.0	SIDIAP	ICD-10
DEM	G30.1	SIDIAP	ICD-10
DEM	G30.9	SIDIAP	ICD-10
RA	M05	SIDIAP	ICD-10
RA	M05.2	SIDIAP	ICD-10
RA	M05.3	SIDIAP	ICD-10
RA	M05.8	SIDIAP	ICD-10
RA	M05.9	SIDIAP	ICD-10
RA	M06	SIDIAP	ICD-10
RA	M06.0	SIDIAP	ICD-10
RA	M06.8	SIDIAP	ICD-10
RA	M06.9	SIDIAP	ICD-10
RA	M08	SIDIAP	ICD-10
RA	M08.0	SIDIAP	ICD-10
RA	M08.2	SIDIAP	ICD-10
RA	M08.4	SIDIAP	ICD-10
RA	M08.9	SIDIAP	ICD-10
STROKE	I61	SIDIAP	ICD-10
STROKE	I61.9	SIDIAP	ICD-10
STROKE	I63	SIDIAP	ICD-10
STROKE	I63.0	SIDIAP	ICD-10
STROKE	I63.1	SIDIAP	ICD-10
STROKE	I63.2	SIDIAP	ICD-10
STROKE	I63.3	SIDIAP	ICD-10
STROKE	I63.4	SIDIAP	ICD-10
STROKE	I63.5	SIDIAP	ICD-10
STROKE	I63.6	SIDIAP	ICD-10
STROKE	I63.8	SIDIAP	ICD-10
STROKE	I63.9	SIDIAP	ICD-10
STROKE	I64	SIDIAP	ICD-10
STROKE	I65	SIDIAP	ICD-10
STROKE	I65.0	SIDIAP	ICD-10
STROKE	I65.1	SIDIAP	ICD-10
STROKE	I65.2	SIDIAP	ICD-10
STROKE	I65.8	SIDIAP	ICD-10
STROKE	I65.9	SIDIAP	ICD-10
STROKE	I65.3	SIDIAP	ICD-10
AMI	DI210	AUH	ICD-10
AMI	DI210A	AUH	ICD-10
AMI	DI210B	AUH	ICD-10
AMI	DI211	AUH	ICD-10
AMI	DI211A	AUH	ICD-10
AMI	DI211B	AUH	ICD-10
AMI	DI212	AUH	ICD-10
AMI	DI212A	AUH	ICD-10
AMI	DI212B	AUH	ICD-10
AMI	DI212G	AUH	ICD-10
AMI	DI213	AUH	ICD-10
AMI	DI214	AUH	ICD-10
AMI	DI219	AUH	ICD-10
AMI	DI212H	AUH	ICD-10
DEM	DF000	AUH	ICD-10
DEM	DF0000	AUH	ICD-10
DEM	DF0001	AUH	ICD-10
DEM	DF0002	AUH	ICD-10
DEM	DF0003	AUH	ICD-10
DEM	DF0004	AUH	ICD-10
DEM	DF001	AUH	ICD-10
DEM	DF0010	AUH	ICD-10
DEM	DF0011	AUH	ICD-10
DEM	DF0012	AUH	ICD-10
DEM	DF0013	AUH	ICD-10
DEM	DF0014	AUH	ICD-10
DEM	DF002	AUH	ICD-10
DEM	DF0020	AUH	ICD-10
DEM	DF0021	AUH	ICD-10
DEM	DF0022	AUH	ICD-10
DEM	DF0023	AUH	ICD-10
DEM	DF0024	AUH	ICD-10
DEM	DF009	AUH	ICD-10
DEM	DF0090	AUH	ICD-10
DEM	DF0092	AUH	ICD-10
DEM	DF0093	AUH	ICD-10
DEM	DF0094	AUH	ICD-10
DEM	DF010	AUH	ICD-10
DEM	DF0100	AUH	ICD-10
DEM	DF0101	AUH	ICD-10
DEM	DF0102	AUH	ICD-10
DEM	DF0103	AUH	ICD-10
DEM	DF0104	AUH	ICD-10
DEM	DF011	AUH	ICD-10
DEM	DF0110	AUH	ICD-10
DEM	DF0111	AUH	ICD-10
DEM	DF0113	AUH	ICD-10
DEM	DF0114	AUH	ICD-10
DEM	DF012	AUH	ICD-10
DEM	DF0120	AUH	ICD-10
DEM	DF0122	AUH	ICD-10
DEM	DF0123	AUH	ICD-10
DEM	DF0124	AUH	ICD-10
DEM	DF013	AUH	ICD-10
DEM	DF0130	AUH	ICD-10
DEM	DF0131	AUH	ICD-10
DEM	DF0133	AUH	ICD-10
DEM	DF0134	AUH	ICD-10
DEM	DF018	AUH	ICD-10
DEM	DF0180	AUH	ICD-10
DEM	DF0181	AUH	ICD-10
DEM	DF0183	AUH	ICD-10
DEM	DF0184	AUH	ICD-10
DEM	DF019	AUH	ICD-10
DEM	DF0190	AUH	ICD-10
DEM	DF0193	AUH	ICD-10
DEM	DF0194	AUH	ICD-10
DEM	DF02	AUH	ICD-10
DEM	DF020	AUH	ICD-10
DEM	DF0203	AUH	ICD-10
DEM	DF0204	AUH	ICD-10
DEM	DF021	AUH	ICD-10
DEM	DF022	AUH	ICD-10
DEM	DF0220	AUH	ICD-10
DEM	DF023	AUH	ICD-10
DEM	DF0230	AUH	ICD-10
DEM	DF0232	AUH	ICD-10
DEM	DF0233	AUH	ICD-10
DEM	DF0234	AUH	ICD-10
DEM	DF028	AUH	ICD-10
DEM	DF0280	AUH	ICD-10
DEM	DF0281	AUH	ICD-10
DEM	DF0282	AUH	ICD-10
DEM	DF0283	AUH	ICD-10
DEM	DF0284	AUH	ICD-10
DEM	DF03	AUH	ICD-10
DEM	DF039	AUH	ICD-10
DEM	DF0390	AUH	ICD-10
DEM	DF0391	AUH	ICD-10
DEM	DF0392	AUH	ICD-10
DEM	DF0393	AUH	ICD-10
DEM	DF0394	AUH	ICD-10
DEM	DF01	AUH	ICD-10
DEM	DF0112	AUH	ICD-10
DEM	DF0121	AUH	ICD-10
DEM	DF0200	AUH	ICD-10
DEM	DF0214	AUH	ICD-10
DEM	DF0231	AUH	ICD-10
RA	DM050	AUH	ICD-10
RA	DM051	AUH	ICD-10
RA	DM051B	AUH	ICD-10
RA	DM051C	AUH	ICD-10
RA	DM051D	AUH	ICD-10
RA	DM051E	AUH	ICD-10
RA	DM052	AUH	ICD-10
RA	DM053	AUH	ICD-10
RA	DM053C	AUH	ICD-10
RA	DM053D	AUH	ICD-10
RA	DM058	AUH	ICD-10
RA	DM059	AUH	ICD-10
RA	DM060	AUH	ICD-10
RA	DM061	AUH	ICD-10
RA	DM062	AUH	ICD-10
RA	DM063	AUH	ICD-10
RA	DM064	AUH	ICD-10
RA	DM068	AUH	ICD-10
RA	DM069	AUH	ICD-10
RA	DM080	AUH	ICD-10
RA	DM080A	AUH	ICD-10
RA	DM080B	AUH	ICD-10
RA	DM081	AUH	ICD-10
RA	DM082	AUH	ICD-10
RA	DM082A	AUH	ICD-10
RA	DM082B	AUH	ICD-10
RA	DM083	AUH	ICD-10
RA	DM084	AUH	ICD-10
RA	DM088	AUH	ICD-10
RA	DM088A	AUH	ICD-10
RA	DM089	AUH	ICD-10
RA	DM050A	AUH	ICD-10
RA	DM053A	AUH	ICD-10
STROKE	DG463	AUH	ICD-10
STROKE	DG464	AUH	ICD-10
STROKE	DI600	AUH	ICD-10
STROKE	DI601	AUH	ICD-10
STROKE	DI602	AUH	ICD-10
STROKE	DI603	AUH	ICD-10
STROKE	DI604	AUH	ICD-10
STROKE	DI605	AUH	ICD-10
STROKE	DI606	AUH	ICD-10
STROKE	DI606A	AUH	ICD-10
STROKE	DI606B	AUH	ICD-10
STROKE	DI606C	AUH	ICD-10
STROKE	DI606D	AUH	ICD-10
STROKE	DI607	AUH	ICD-10
STROKE	DI608	AUH	ICD-10
STROKE	DI609	AUH	ICD-10
STROKE	DI610	AUH	ICD-10
STROKE	DI610A	AUH	ICD-10
STROKE	DI611	AUH	ICD-10
STROKE	DI611A	AUH	ICD-10
STROKE	DI611B	AUH	ICD-10
STROKE	DI612	AUH	ICD-10
STROKE	DI613	AUH	ICD-10
STROKE	DI614	AUH	ICD-10
STROKE	DI615	AUH	ICD-10
STROKE	DI616	AUH	ICD-10
STROKE	DI618	AUH	ICD-10
STROKE	DI619	AUH	ICD-10
STROKE	DI620	AUH	ICD-10
STROKE	DI621	AUH	ICD-10
STROKE	DI629	AUH	ICD-10
STROKE	DI630	AUH	ICD-10
STROKE	DI631	AUH	ICD-10
STROKE	DI632	AUH	ICD-10
STROKE	DI633	AUH	ICD-10
STROKE	DI634	AUH	ICD-10
STROKE	DI634A	AUH	ICD-10
STROKE	DI635	AUH	ICD-10
STROKE	DI636	AUH	ICD-10
STROKE	DI638	AUH	ICD-10
STROKE	DI639	AUH	ICD-10
STROKE	DI649	AUH	ICD-10
STROKE	DI694	AUH	ICD-10
STROKE	DG463E	AUH	ICD-10
STROKE	DI609A	AUH	ICD-10
AMI	K75.00 DIAGNOSIS	IPCI	ICPC
DEM	P70.00 DIAGNOSIS	IPCI	ICPC
DEM	P70.01 DIAGNOSIS	IPCI	ICPC
DEM	P70.02 DIAGNOSIS	IPCI	ICPC
RA	L88.00 DIAGNOSIS	IPCI	ICPC
STROKE	K90.00 DIAGNOSIS	IPCI	ICPC

## Sheet: TABLE S3
Table S4: Age specific breakdown of dementia occurance in 10 year intervals with duration of treatment usage
	MTX	SUL	n Cases
Age group	Mean Years of use (range)	Mean Years of use (range)
< 65	1.0841 (0.635 - 1.533)	-	15
> 65 < 70	3.467 (3.012 -4.107)	8.968 (2.207-19.496)	24
> 70 < 75	2.313 (0.548-4.893)	3.721 (0.0684 - 8.9308)	54
> 75 < 80	3.452 (0.073-18.83)	2.1998 (0.1369-6.0232)	116
>80 < 85	1.489 (0.073-7.381)	1.282 (0.0355-1.2825)	161
> 85	3.963 (0.410-3.963)	2.205 (0.0355-7.1868)	118
Methotrexate (MTX); sulfasalazine (SSZ)

## Sheet: TABLE S4
Table S3: Association between of days of use of methotrexate treatment and dementia diagnosis in people with rheumatoid arthritis using conditional logistic regression analysis
	Model 0		Model 1		Model 2
Variable group	Unadjusted OR (95% CI)	p value	Adjusted OR (95% CI)	p value	Adjusted OR (95% CI)	p value
No MTX use	REF		REF		REF
MTX use for <432 days (first tertile)	1.373 (0.798-2.546)	0.315	1.278 (0.680-2.401)	0.446	1.296 (0.691-2.431)	0.42
MTX use for 432 to 1,500 days (second tertile)	0.785 (0.398-1.549)	0.484	0.786 (0.391-1.581)	0.5	0.774 (0.386-1.554)	0.472
MTX use for >1,500 days (third tertile)	0.390 (0.182-0.835)	0.015	0.384 (0.177-0.837)	0.016	0.369 (0.171-0.794)	0.011
Methotrexate (MTX); Model 0: no adjustment; Model 1 adjustment for age, BMI, stroke and AMI; Model 2: same as model 1 but not including stroke variable

## Sheet: FIGURE S1
Figure S1: Forest plot showing the Associations between methotrexate and sulfasalazine treatment with dementia diagnosis in people with rheumatoid arthritis using conditional logistic regression analysis
Model 0: no adjustment; Model 1 adjustment for age, BMI, stroke and AMI; Model 2: same as model 1 but not including stroke variable

## Sheet: TABLE1_raw
Table 6: Summary Demographics case-control analysis Databases
IPCI, AUH & UPF
	IPCI Case			AUH Case			UPF Case			HSD Case			SIDIAP Case			THIN Case
Class	10205			9317			3288			1455			111208			47374
Diagnosed with RA	441	0.0432	441 (4.32%)	156	0.0167	156 (1.67%)	38	0.0116	38 (1.16%)	15	0.0103	15 (1.03%)	1125	0.0101	1125 (1.01%)	900	0.019	900 (1.90%)
Time since RA	2553	(± 2733)	2553 (± 2733)	2460	(± 1737)	2460 (± 1737)	2280	(± 1734)	2280 (± 1734)	2714	(± 3107)	2714 (± 3107)	1776	(± 1025)	1776 (± 1025)	5342	(± 4537)	5342 (± 4537)
Diagnosed with PSO	341	0.0334	341 (3.34%)	75	0.008	75 (0.80%)	35	0.0106	35 (1.06%)	33	0.0227	33 (2.27%)	1682	0.0151	1682 (1.51%)	1508	0.0318	1508 (3.18%)
Time since PSO	2842	(± 2790)	2842 (± 2790)	2367	(± 1452)	2367 (± 1452)	2720	(± 2151)	2720 (± 2151)	1892	(± 1766)	1892 (± 1766)	1828	(± 1054)	1828 (± 1054)	6312	(± 5603)	6312 (± 5603)
Prescribed with SUL	54	0.0053	54 (0.53%)	61	0.0065	61 (0.65%)	-		-	2	0.0014	2 (0.14%)	89	0.0008	89 (0.08%)	218	0.0046	218 (0.46%)
Days of SUL use	676.24	(± 1195.7)	676.24 (± 1195.7)	1114.03	(± 1179.9)	1114.03 (± 1179.9)	-		-	1920.5	(± 2574.6)	1920.5 (± 2574.6)	323.72	(± 549.8)	323.72 (± 549.8)	1014.83	(± 1395.6)	1014.83 (± 1395.6)
Prescribed with MTX	127	0.0124	127 (1.24%)	140	0.015	140 (1.50%)	-		-	6	0.0041	6 (0.41%)	669	0.006	669 (0.60%)	4	0.0001	4 (0.01%)
Days of MTX use	1120.6	(± 1270)	1120.6 (± 1270)	1041.3	(± 881)	1041.3 (± 881)	-		-	99.3	(± 91)	99.3 (± 91)	72.9	(± 51)	72.9 (± 51)	247	(± 297)	247 (± 297)
Gender			63.6 %F			59.3 %F			58.5 %F			53.3 %F			66.5 %F			67.8 %F
Age at index date	80.5	(± 7.68)	80.5 (± 7.68)	80.5	(± 8.58)	80.5 (± 8.58)	80.8	(± 8.08)	80.8 (± 8.08)	65.2	(± 10.2)	65.2 (± 10.2)	81.5	(± 7.54)	81.5 (± 7.54)	79.6	(± 8.23)	79.6 (± 8.23)
number of GP visits BEFORE	108	(± 93.4)	108 (± 93.4)	-		-	-		-	33	(± 48.4)	33 (± 48.4)	38	(± 33.9)	38 (± 33.9)	54	(± 60.7)	54 (± 60.7)
Total Time in Database	3.32	(± 2.11)	3.32 (± 2.11)	8.02	(± 3.08)	8.02 (± 3.08)	9.77	(± 6.1)	9.77 (± 6.1)	12.12	(± 3.01)	12.12 (± 3.01)	8.01	(± 2.51)	8.01 (± 2.51)	16.66	(± 17.65)	16.66 (± 17.65)
Time in Database before Index date	1.84	(± 1.84)	1.84 (± 1.84)	5.63	(± 3.19)	5.63 (± 3.19)	8.02	(± 5.85)	8.02 (± 5.85)	5.86	(± 3.68)	5.86 (± 3.68)	4.68	(± 2.72)	4.68 (± 2.72)	14.1	(± 17.27)	14.1 (± 17.27)
Time in Database After Index date	1.48	(± 1.32)	1.48 (± 1.32)	2.39	(± 2.3)	2.39 (± 2.3)	1.74	(± 2.2)	1.74 (± 2.2)	6.26	(± 3.71)	6.26 (± 3.71)	3.33	(± 2.4)	3.33 (± 2.4)	2.56	(± 2.51)	2.56 (± 2.51)
Highest BMI before index date	27.5	(± 4.54)	27.5 (± 4.54)	24.6	(± 4.58)	24.6 (± 4.58)	27.7	(± 4.67)	27.7 (± 4.67)	26.2	(± 4.5)	26.2 (± 4.5)	29	(± 4.74)	29 (± 4.74)	26.1	(± 5.02)	26.1 (± 5.02)
BMI missingness			0.57			0.77			0.9			0.72			0.24			0.34
Diagnosed with HYPERTENS	4912	0.481	4912 (48.10%)	3359	0.361	3359 (36.10%)	2048	0.623	2048 (62.30%)	770	0.529	770 (52.90%)	72101	0.648	72101 (64.80%)	21133	0.446	21133 (44.60%)
Diagnosed with AMI	728	0.0713	728 (7.13%)	576	0.0618	576 (6.18%)	143	0.0435	143 (4.35%)	25	0.0172	25 (1.72%)	1677	0.0151	1677 (1.51%)	3360	0.0709	3360 (7.09%)
Diagnosed with STROKE	1229	0.12	1229 (12.00%)	1277	0.137	1277 (13.70%)	428	0.13	428 (13.00%)	80	0.055	80 (5.50%)	9417	0.085	9417 (8.50%)	4669	0.099	4669 (9.90%)
	IPCI Control			AUH Control			UPF Control			HSD Control			SIDIAP Control				THIN Control
Class	108209			223766			39633			13049			1997142			186640
Diagnosed with RA	4726	0.0437	4726 (4.37%)	1945	0.0087	1945 (0.87%)	237	0.006	237 (0.60%)	42	0.0032	42 (0.32%)	21605	0.0108	21605 (1.08%)	3118	0.0167	3118 (1.67%)
Time since RA	2479	(± 2326)	2479 (± 2326)	2473	(± 1166)	2473 (± 1166)	2606	(± 2174)	2606 (± 2174)	2001	(± 1818)	2001 (± 1818)	1653	(± 992)	1653 (± 992)	4993	(± 4586)	4993 (± 4586)
Diagnosed with PSO	3946	0.0365	3946 (3.65%)	665	0.003	665 (0.30%)	341	0.0086	341 (0.86%)	173	0.0133	173 (1.33%)	33000	0.0165	33000 (1.65%)	4897	0.0262	4897 (2.62%)
Time since PSO	2464	(± 2514)	2464 (± 2514)	2521	(± 1555)	2521 (± 1555)	3644	(± 2789)	3644 (± 2789)	2119	(± 2338)	2119 (± 2338)	1708	(± 1024)	1708 (± 1024)	6120	(± 5702)	6120 (± 5702)
Prescribed with SUL	778	0.0072	778 (0.72%)	2114	0.0094	2114 (0.94%)	-		-	18	0.0014	18 (0.14%)	1876	0.0009	1876 (0.09%)	983	0.0053	983 (0.53%)
Days of SUL use	658.03	(± 1178.8)	658.03 (± 1178.8)	401.29	(± 319.8)	401.29 (± 319.8)	-		-	244.5	(± 264.6)	244.5 (± 264.6)	301.27	(± 544.1)	301.27 (± 544.1)	1111.35	(± 1371.7)	1111.35 (± 1371.7)
Prescribed with MTX	1303	0.012	1303 (1.20%)	2658	0.0119	2658 (1.19%)	-		-	17	0.0013	17 (0.13%)	14384	0.0072	14384 (0.72%)	18	0.0001	18 (0.01%)
Days of MTX use	1053.5	(± 157)	1053.5 (± 157)	1063.4	(± 212)	1063.4 (± 212)	-		-	171.6	(± 0)	171.6 (± 0)	50.6	(± 0)	50.6 (± 0)	58.2	(± 0)	58.2 (± 0)
Gender			63.4 %F			60 %F			58.5 %F			52.8 %F			68 %F			69.4 %F
Age at index date	77.9	(± 7.85)	77.9 (± 7.85)	80.3	(± 8.53)	80.3 (± 8.53)	80.7	(± 8.02)	80.7 (± 8.02)	64	(± 9.43)	64 (± 9.43)	80.1	(± 7.27)	80.1 (± 7.27)	77.1	(± 8.57)	77.1 (± 8.57)
number of GP visits BEFORE	94	(± 85.4)	94 (± 85.4)	-		-	-		-	7	(± 20.9)	7 (± 20.9)	30	(± 26.2)	30 (± 26.2)	33	(± 44)	33 (± 44)
Total Time in Database	3.8	(± 2.19)	3.8 (± 2.19)	9.66	(± 2.35)	9.66 (± 2.35)	12.19	(± 5.97)	12.19 (± 5.97)	12.3	(± 3.03)	12.3 (± 3.03)	8.79	(± 2.19)	8.79 (± 2.19)	18.59	(± 17.09)	18.59 (± 17.09)
Time in Database before Index date	1.24	(± 1.51)	1.24 (± 1.51)	5.79	(± 3.18)	5.79 (± 3.18)	8.63	(± 5.59)	8.63 (± 5.59)	4.37	(± 3.14)	4.37 (± 3.14)	4.37	(± 2.71)	4.37 (± 2.71)	12.96	(± 16.2)	12.96 (± 16.2)
Time in Database After Index date	2.56	(± 1.93)	2.56 (± 1.93)	3.87	(± 2.86)	3.87 (± 2.86)	3.56	(± 3.43)	3.56 (± 3.43)	7.93	(± 3.7)	7.93 (± 3.7)	4.43	(± 2.68)	4.43 (± 2.68)	5.63	(± 4.72)	5.63 (± 4.72)
Highest BMI before index date	28.2	(± 4.72)	28.2 (± 4.72)	25.9	(± 5.36)	25.9 (± 5.36)	29	(± 4.84)	29 (± 4.84)	25.9	(± 5.21)	25.9 (± 5.21)	29.6	(± 4.79)	29.6 (± 4.79)	26.9	(± 4.92)	26.9 (± 4.92)
BMI missingness			0.51			0.8			0.89			0.84			0.22			0.35
Diagnosed with HYPERTENS	55385	0.512	55385 (51.20%)	69225	0.309	69225 (30.90%)	15324	0.387	15324 (38.70%)	1420	0.109	1420 (10.90%)	1314400	0.658	1314400 (65.80%)	75878	0.407	75878 (40.70%)
Diagnosed with AMI	6900	0.0638	6900 (6.38%)	14651	0.0655	14651 (6.55%)	1368	0.0345	1368 (3.45%)	38	0.0029	38 (0.29%)	26002	0.013	26002 (1.30%)	9605	0.0515	9605 (5.15%)
Diagnosed with STROKE	6901	0.064	6901 (6.40%)	16767	0.075	16767 (7.50%)	1788	0.045	1788 (4.50%)	80	0.006	80 (0.60%)	73595	0.037	73595 (3.70%)	8272	0.044	8272 (4.40%)
Table S5 raw compelete case
	IPCI Case			IPCI Control			AUH Case			AUH Control			UPF Case			UPF Control
Number of Patients	4011			27222			2105			25546			261			769
Diagnosed with DEM	1			0				1		0				1		0
Diagnosed with RA	177	0.0441	177 (4.41%)	1306	0.048	1306 (4.80%)	53	0.0252	53 (2.52%)	157	0.0061	157 (0.61%)	3	0.0115	3 (1.15%)	19	0.0247	19 (2.47%)
Time since RA	2548	(± 2144)	2548 (± 2144)	2673	(± 2491)	2673 (± 2491)	2567	(± 1995)	2567 (± 1995)	3558	(± 1633)	3558 (± 1633)	2670	(± 559)	2670 (± 559)	4010	(± 2791)	4010 (± 2791)
Diagnosed with PSO	167	0.0416	167 (4.16%)	1236	0.0454	1236 (4.54%)	22	0.0105	22 (1.05%)	81	0.0032	81 (0.32%)	7	0.0268	7 (2.68%)	14	0.0182	14 (1.82%)
Time since PSO	3041	(± 2774)	3041 (± 2774)	2572	(± 2448)	2572 (± 2448)	2660	(± 1625)	2660 (± 1625)	973	(± 1194)	973 (± 1194)	2715	(± 2756)	2715 (± 2756)	2690	(± 3115)	2690 (± 3115)
Prescribed with SUL	20	0.005	20 (0.50%)	249	0.0091	249 (0.91%)	20	0.0095	20 (0.95%)	226	0.0088	226 (0.88%)	-		-	-		-
Days of SUL use	631.55	(± 1238)	631.55 (± 1238)	825.79	(± 1452.6)	825.79 (± 1452.6)	907.3	(± 988)	907.3 (± 988)	536.66	(± 133.9)	536.66 (± 133.9)	-		-	-		-
Prescribed with MTX	65	0.0162	65 (1.62%)	372	0.0137	372 (1.37%)	64	0.0304	64 (3.04%)	298	0.0117	298 (1.17%)	-		-	-		-
Days of MTX use	1232.2	(± 1502)	1232.2 (± 1502)	1103.8	(± 313)	1103.8 (± 313)	986.6	(± 1043)	986.6 (± 1043)	1368.9	(± 147)	1368.9 (± 147)	-		-	-		-
Gender		60.3 %F	60.3 %F		61.1 %F	61.1 %F		56.2 %F	56.2 %F		58.2 %F	58.2 %F		47.5 %F	47.5 %F		47.2 %F	47.2 %F
Age at index date	79.3	(± 7.1)	79.3 (± 7.1)	77.4	(± 6.82)	77.4 (± 6.82)	80.1	(± 8.43)	80.1 (± 8.43)	80.1	(± 8.18)	80.1 (± 8.18)	79.8	(± 7)	79.8 (± 7)	79.2	(± 6.78)	79.2 (± 6.78)
number of GP visits BEFORE	138	(± 104.5)	138 (± 104.5)	122	(± 93.5)	122 (± 93.5)	-		-	-		-	-		-	-		-
Total Time in Database	3.39	(± 2.12)	3.39 (± 2.12)	3.52	(± 2.19)	3.52 (± 2.19)	9.96	(± 1.91)	9.96 (± 1.91)	10.67	(± 1.17)	10.67 (± 1.17)	11.82	(± 6.63)	11.82 (± 6.63)	13.74	(± 6.74)	13.74 (± 6.74)
Time in Database before Index date	1.97	(± 1.89)	1.97 (± 1.89)	1.37	(± 1.63)	1.37 (± 1.63)	8.82	(± 1.92)	8.82 (± 1.92)	9.52	(± 1.38)	9.52 (± 1.38)	10.45	(± 6.7)	10.45 (± 6.7)	12.18	(± 6.91)	12.18 (± 6.91)
Time in Database After Index date	1.42	(± 1.25)	1.42 (± 1.25)	2.14	(± 1.73)	2.14 (± 1.73)	1.13	(± 1.04)	1.13 (± 1.04)	1.14	(± 0.86)	1.14 (± 0.86)	1.37	(± 1.49)	1.37 (± 1.49)	1.56	(± 1.71)	1.56 (± 1.71)
Highest BMI before index date	27.5	(± 4.56)	27.5 (± 4.56)	28.3	(± 4.78)	28.3 (± 4.78)	24.6	(± 4.58)	24.6 (± 4.58)	26	(± 5.39)	26 (± 5.39)	27.8	(± 4.74)	27.8 (± 4.74)	28.8	(± 4.71)	28.8 (± 4.71)
Diagnosed with HYPERTENS	2464	0.614	2464 (61.40%)	17991	-0.661	17991 (-66.10%)	989	0.47	989 (47.00%)	12207	0.478	12207 (47.80%)	193	0.739	193 (73.90%)	531	0.691	531 (69.10%)
Diagnosed with AMI	325	0.081	325 (8.10%)	2124	0.078	2124 (7.80%)	178	0.0846	178 (8.46%)	2687	-0.1052	2687 (-10.52%)	15	0.0575	15 (5.75%)	54	0.0702	54 (7.02%)
Diagnosed with STROKE	547	0.136	547 (13.60%)	1950	0.072	1950 (7.20%)	344	0.163	344 (16.30%)	1927	0.075	1927 (7.50%)	48	0.184	48 (18.40%)	54	0.07	54 (7.00%)
	14
Table 21: Summary Demographics complete case case-control anal-
ysis Databases HSD, SIDIAP & THIN
	HSD Case			HSD Control			SIDIAP Case			SIDIAP Control			THIN Case			THIN Control
Number of Patients	316			547			84005			1259984				29264		87941
Diagnosed with DEM		1		0			1			0				1		0
Diagnosed with RA	5	0.0158	5 (1.58%)	1	0.0018	1 (0.18%)	905	0.0108	905 (1.08%)	14851	0.0118	14851 (1.18%)	612	0.0209	612 (2.09%)	1611	0.0183	1611 (1.83%)
Time since RA	2808	(± 2120)	2808 (± 2120)	1356	(± NA)	1356 (± NA)	1880	(± 1041)	1880 (± 1041)	1809	(± 1013)	1809 (± 1013)	5245	(± 4412)	5245 (± 4412)	4947	(± 4519)	4947 (± 4519)
Diagnosed with PSO	12	0.038	12 (3.80%)	19	0.0347	19 (3.47%)	1435	0.0171	1435 (1.71%)	25142	0.02	25142 (2.00%)	1073	0.0367	1073 (3.67%)	2946	0.0335	2946 (3.35%)
Time since PSO	2259	(± 1437)	2259 (± 1437)	2063	(± 1746)	2063 (± 1746)	1895	(± 1056)	1895 (± 1056)	1813	(± 1038)	1813 (± 1038)	6367	(± 5668)	6367 (± 5668)	6098	(± 5657)	6098 (± 5657)
Prescribed with SUL	2	0.0063	2 (0.63%)	1	0.0018	1 (0.18%)	73	0.0009	73 (0.09%)	1429	0.0011	1429 (0.11%)	172	0.0059	172 (0.59%)	602	0.0068	602 (0.68%)
Days of SUL use	1920.5	(± 2574.6)	1920.5 (± 2574.6)	25	(± NA)	25 (± NA)	349.25	(± 580.5)	349.25 (± 580.5)	314.71	(± 571.6)	314.71 (± 571.6)	1096.27	(± 1454.7)	1096.27 (± 1454.7)	1216.69	(± 1496.1)	1216.69 (± 1496.1)
Prescribed with MTX	3	0.0095	3 (0.95%)	2	0.0037	2 (0.37%)	565	0.0067	565 (0.67%)	10588	0.0084	10588 (0.84%)	2	0.0001	2 (0.01%)	11	0.0001	11 (0.01%)
Days of MTX use	97.3	(± 140)	97.3 (± 140)	24	(± 0)	24 (± 0)	72.9	(± 51)	72.9 (± 51)	48.8	(± 0)	48.8 (± 0)	389	(± 426)	389 (± 426)	38.9	(± 0)	38.9 (± 0)
Gender		51.3 %F	51.3 %F		53.2 %F	53.2 %F		65.1 %F	65.1 %F		65.9 %F	65.9 %F		64.2 %F	64.2 %F		64.7 %F	64.7 %F
Age at index date	65.3	(± 9.83)	65.3 (± 9.83)	65	(± 9.4)	65 (± 9.4)	81	(± 7.25)	81 (± 7.25)	79.4	(± 6.79)	79.4 (± 6.79)	78.4	(± 8.15)	78.4 (± 8.15)	75.8	(± 8.53)	75.8 (± 8.53)
number of GP visits BEFORE	66	(± 62.4)	66 (± 62.4)	47	(± 55.4)	47 (± 55.4)	45	(± 34.5)	45 (± 34.5)	39	(± 26.6)	39 (± 26.6)	70	(± 66.9)	70 (± 66.9)	49	(± 52.5)	49 (± 52.5)
Total Time in Database	12.12	(± 2.93)	12.12 (± 2.93)	12.71	(± 2.43)	12.71 (± 2.43)	8.35	(± 2.3)	8.35 (± 2.3)	9.17	(± 1.8)	9.17 (± 1.8)	17.62	(± 17.62)	17.62 (± 17.62)	18.61	(± 16.66)	18.61 (± 16.66)
Time in Database before Index date	6.95	(± 3.98)	6.95 (± 3.98)	6.83	(± 3.64)	6.83 (± 3.64)	5.04	(± 2.69)	5.04 (± 2.69)	4.98	(± 2.68)	4.98 (± 2.68)	15.11	(± 17.35)	15.11 (± 17.35)	13.52	(± 16.13)	13.52 (± 16.13)
Time in Database After Index date	5.17	(± 3.49)	5.17 (± 3.49)	5.88	(± 3.6)	5.88 (± 3.6)	3.3	(± 2.36)	3.3 (± 2.36)	4.2	(± 2.59)	4.2 (± 2.59)	2.51	(± 2.34)	2.51 (± 2.34)	5.09	(± 4.22)	5.09 (± 4.22)
Highest BMI before index date	26.2	(± 4.58)	26.2 (± 4.58)	26.4	(± 5.24)	26.4 (± 5.24)	29	(± 4.74)	29 (± 4.74)	29.8	(± 4.78)	29.8 (± 4.78)	26.2	(± 5.03)	26.2 (± 5.03)	27.1	(± 4.96)	27.1 (± 4.96)
Diagnosed with HYPERTENS	206	0.652	206 (65.20%)	170	0.311	170 (31.10%)	59351	0.707	59351 (70.70%)	923464	0.733	923464 (73.30%)	15075	0.515	15075 (51.50%)	43722	0.497	43722 (49.70%)
Diagnosed with AMI	8	0.0253	8 (2.53%)	6	0.011	6 (1.10%)	1409	0.0168	1409 (1.68%)	19520	0.0155	19520 (1.55%)	2358	0.0806	2358 (8.06%)	5267	0.0599	5267 (5.99%)
Diagnosed with STROKE	26	0.082	26 (8.20%)	16	0.029	16 (2.90%)	7335	0.087	7335 (8.70%)	51846	0.041	51846 (4.10%)	2927	0.1	2927 (10.00%)	3853	0.044	3853 (4.40%)
